# Supplementary material for: Paper cone spray ionization mass spectrometry (PCSI MS) for simple and rapid analysis of raw solid samples
Source: Royal Society of Chemistry journal article supplement (doi:10.1039/c5an01062d), 2015-01-01
Supplement: c5an01062d1.pdf [file c5an01062d1.pdf]

## **Electronic Supplementary Information**

for

### **Paper cone spray ionization mass spectrometry (PCSI MS) for simple and rapid analysis of raw solid samples**

Purum Kim and Sangwon Cha\*

Department of Chemistry, Hankuk University of Foreign Studies, Yongin, 449-791, Korea.

*Correspondence to:* Sangwon Cha; *e-mail:* [swcha@hufs.ac.kr](mailto:swcha@hufs.ac.kr)

### **Contents**

I. Experimental Section

II. Supplementary Table

III. Supplementary Figures

IV. Supplementary References

## **I. Experimental Section.**

**Chemicals and Materials.** Information of pharmaceutical tablets used in this study is summarized in Table S1. Eye-of-round ground beef, infant formula, and green tea leaves were purchased from a local grocery store. Low-nitrogen parchment weighing papers with the thickness of 0.02 mm and the weight of 20 g/m<sup>2</sup> (Cat. No. KA22-13) were obtained from Korea Ace Scientific Co. (Seoul, Korea). Grade 1, grade 2, and glass microfiber filter papers and a Grade 31 ET chromatography paper were purchased from Whatman (Maidstone, England). Various solvents including methanol, ethanol, isopropanol, hexane were obtained from Fisher scientific (Fairlawn, NJ, USA).

**Paper cone spray tips and sample preparation.** A triangular-pyramidal-shaped paper cone tip was prepared by folding a circular-sector-shaped paper (a quadrant with a radius of 1.5 cm). The volume of the prepared paper cone tip was about 77  $\mu$ L. For pharmaceutical tablet analysis, a tablet was first crushed by using a pestle and mortar, and the resulting powders (1.0 to 5.0 mg) were loaded to a paper cone tip. Other solid samples (ground beef, green tea leaves, and infant formula) were directly added to a paper cone tip without any pretreatment.

**PCSI MS.** For PCSI MS analysis, a paper cone tip with a desired solid sample was located in front of a MS inlet by fixing it with an alligator clip connected to a high voltage power supply [Figure 1(b)]. The paper cone tip was located 5 mm away from the mass inlet and at 30 degrees to the horizontal. After positioning the paper cone tip, 20 to 50  $\mu$ L of spraying solvent was added to the paper cone tip. A high voltage was applied to the paper cone tip either immediately after or 30 to 60 seconds after spraying solvent was added. Mass spectrometric analysis was performed using a Thermo Finnigan LCQ Deca XP MAX quadrupole ion trap mass spectrometer (Thermo Scientific Inc., San Jose, CA, USA). The voltage used for PCSI MS was  $\pm$  3 - 4 kV. Capillary voltage and temperature were set to 35 V and 250  $^{\circ}$ C, respectively.

## II. Supplementary Table

**Supplementary Table S1.** Information of pharmaceutical tablets analyzed in this study.

| <b>Drug</b>          | <b>Active ingredient</b>         | <b>Manufacturer</b>   | <b>Amount of active ingredient per tablet</b> | <b>Amount of active ingredient per 1 mg of tablet powder</b> |
|----------------------|----------------------------------|-----------------------|-----------------------------------------------|--------------------------------------------------------------|
| Diazepam             | Diazepam                         | Myung-In Pharm.       | 2 mg                                          | 12.4 µg                                                      |
| Stilnox              | Zolpidem tartrate                | Sanofi-Aventis        | 10 mg                                         | 64 µg                                                        |
| Zantac 75            | Ranitidine                       | GlaxoSmithKline       | 75 mg                                         | 490 µg                                                       |
| Claritin (Clarityne) | Loratadine                       | MSD                   | 10 mg                                         | 99 µg                                                        |
| Norvasc              | Amlodipine                       | Pfizer                | 5 mg                                          | 25 µg                                                        |
| Crestor              | Rosuvastatin calcium             | AstraZeneca           | 20 mg                                         | 63 µg                                                        |
| Zesfan gold          | Dimethicone DL-carnitine         | Chong Kun Dang Pharm. | 50 mg (Dimethicone)                           | 74 µg                                                        |
| Soksipan             | Dimethicone Ursodeoxycholic acid | Green Cross           | 25 mg (Dimethicone)                           | 52 µg                                                        |

### III. Supplementary Figures

**Supplementary Figure S1.** The extracted ion chromatograms for  $[\text{PC } 34:1 + \text{K}]^+$  ion at  $m/z$  798.8 detected from a 5.0 mg ground beef sample by PCSI MS with (a) a weighing paper cone tip and (b) a filter paper cone tip. The spraying solvent was 50  $\mu\text{L}$  ethanol. As shown in the figure, more stable and higher analyte signals were observed for a longer period of time with the weighing paper cone tip. As a result, total ion counts (area of chromatogram) of  $[\text{PC } 34:1 + \text{K}]^+$  was more than 10 fold higher with the weighing paper cone tip than with the filter paper one.

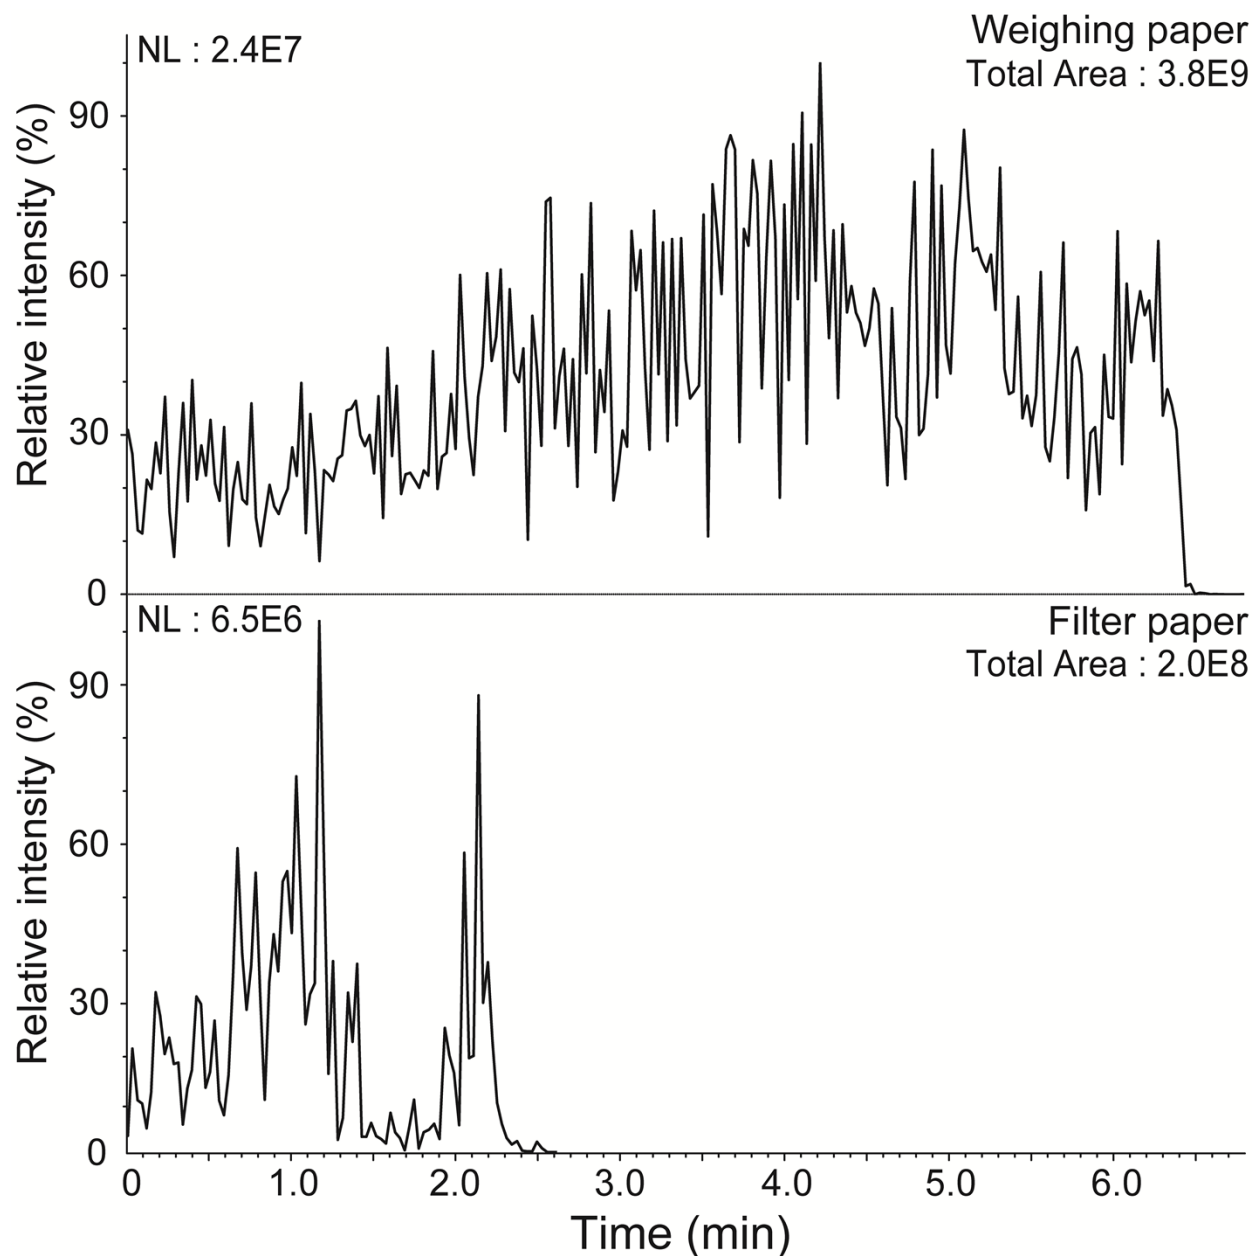

**Supplementary Figure S2.** Tandem mass spectra of the major active components detected from various powdered tablets (Fig. 2). See supplementary references 1-6 for the reference tandem mass spectra.

**(a) Diazepam**

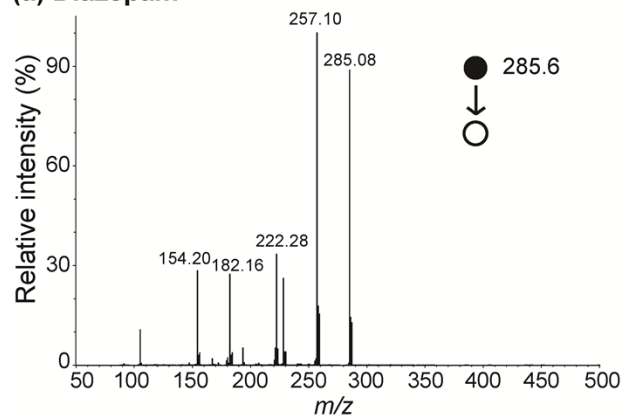

**(d) Claritin**

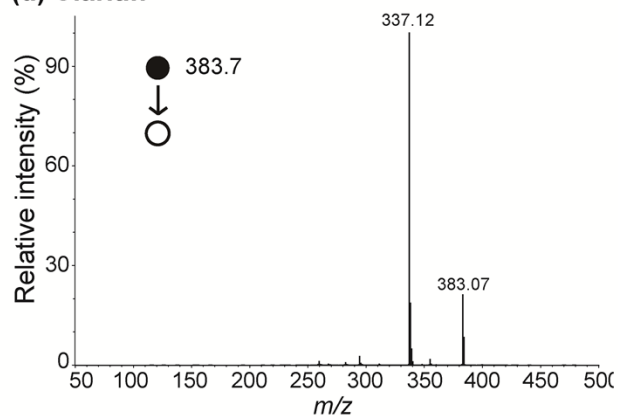

**(b) Stilnox**

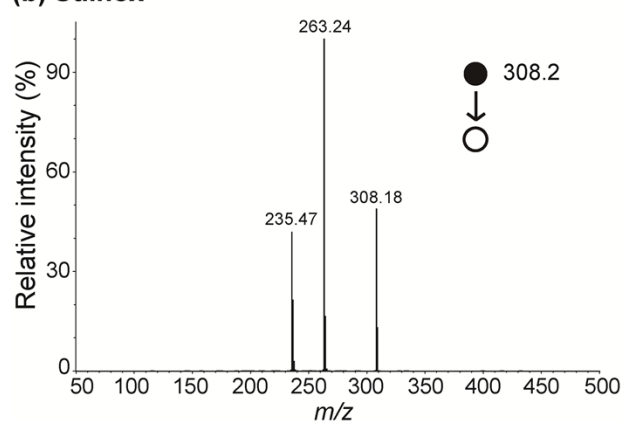

**(e) Norvasc**

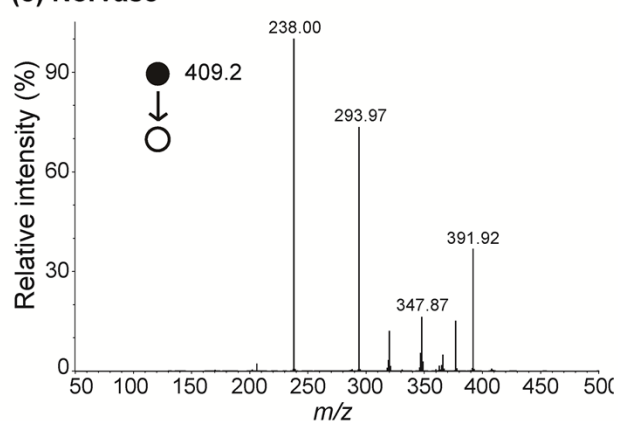

**(c) Zantac 75**

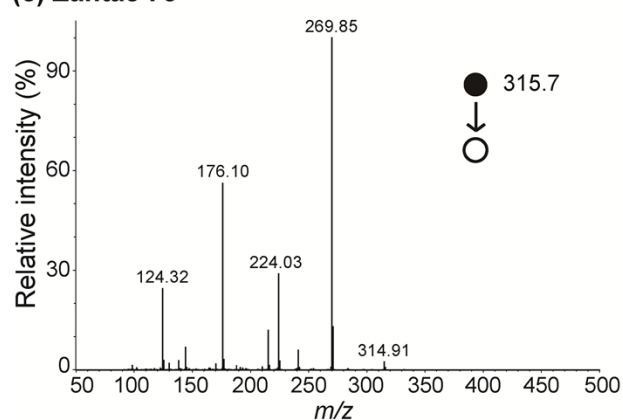

**(f) Crestor, Negative mode**

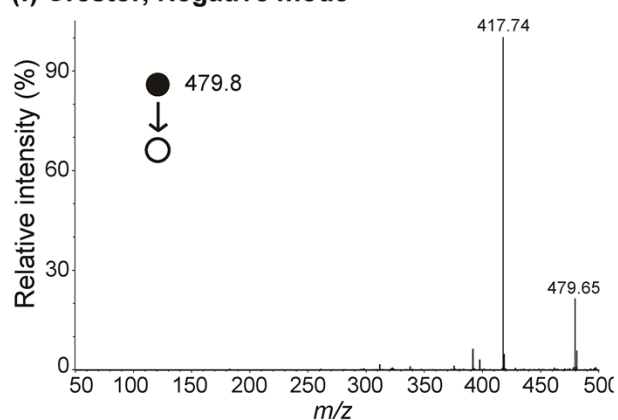

**Supplementary Figure S3.** Tandem mass spectra for the ions  $[\text{PC } 34:1 + \text{Na}]^+$  at  $m/z$  783 and  $[\text{TAG } 52:2 + \text{Na}]^+$  at  $m/z$  882 detected from a ground beef sample [Fig. 5(c)].

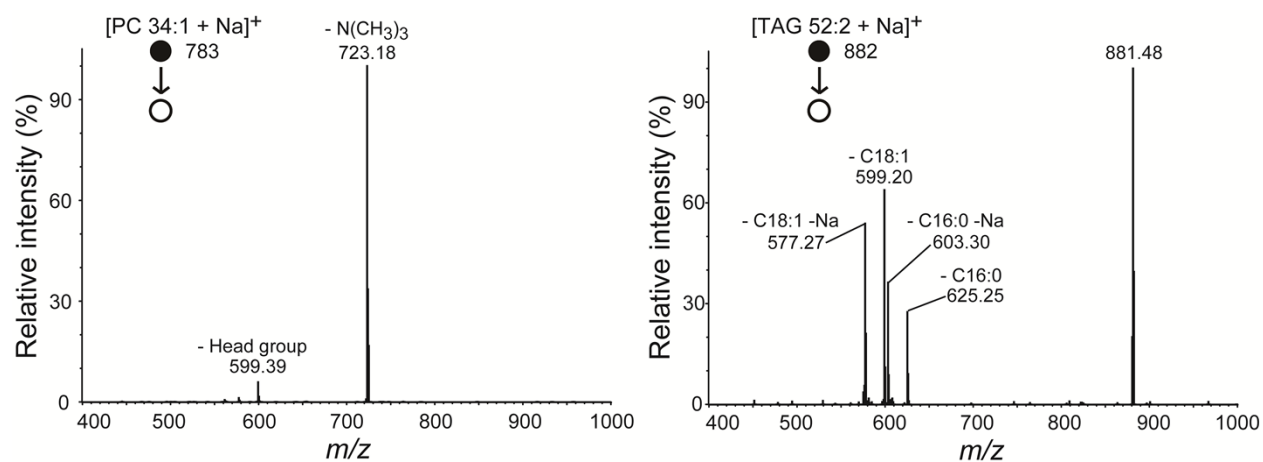

#### IV. Supplementary References

1. W. Weinmann, A. Wiedemann, B. Eppinger, M. Renz and M. Svoboda, *J Am Soc Mass Spectrom* 1999, **10**, 1028–1037.
2. L. A. Leuthold, J. Mandscheff, M. Fathi, C. Giroud, M. Augsburg, E. Varesio and G. Hopfgartner, *Rapid Commun. Mass Spectrom.*, 2006, **20**, 103–110.
3. D. J. Weston, R. Bateman, I. D. Wilson, T. R. Wood and C. S. Creaser, *Anal. Chem.*, 2005, **77**, 7572–7580.
4. H. Chen, N. N. Talaty, Z. Takats and R. G. Cooks, *Anal. Chem.*, 2005, **77**, 6915–6927
5. R. Haddad, R. Sparrapan and M. N. Eberlin, *Rapid Commun. Mass Spectrom.*, 2006, **20**, 2901–2905.
6. J. Gao, D. Zhong, X. Duan and X. Chen, *J. Chromatogr. B*, 2007, **856**, 35–40
